# Supplementary material for: Fabrication and development of a microfluidic paper-based immunosorbent assay platform (μPISA) for colorimetric detection of hepatitis C
Source: Royal Society of Chemistry journal article supplement (doi:10.1039/d2an01761j), 2023-01-01
Supplement: d2an01761j1.pdf [file d2an01761j1.pdf]

## Fabrication and Development of Microfluidic-Paper-based Immunosorbent Assay Platform ( $\mu$ PISA) for Colorimetric Detection of Hepatitis C

Fatih Ozefe<sup>1</sup>, Ahu Arslan-Yildiz<sup>1\*</sup>

<sup>1</sup>Izmir Institute of Technology, Faculty of Engineering, Department of Bioengineering, 35430, Urla, Izmir, Turkey

\* Corresponding Author: ahuarslan@iyte.edu.tr; arslanahu@gmail.com

### Supplementary Information

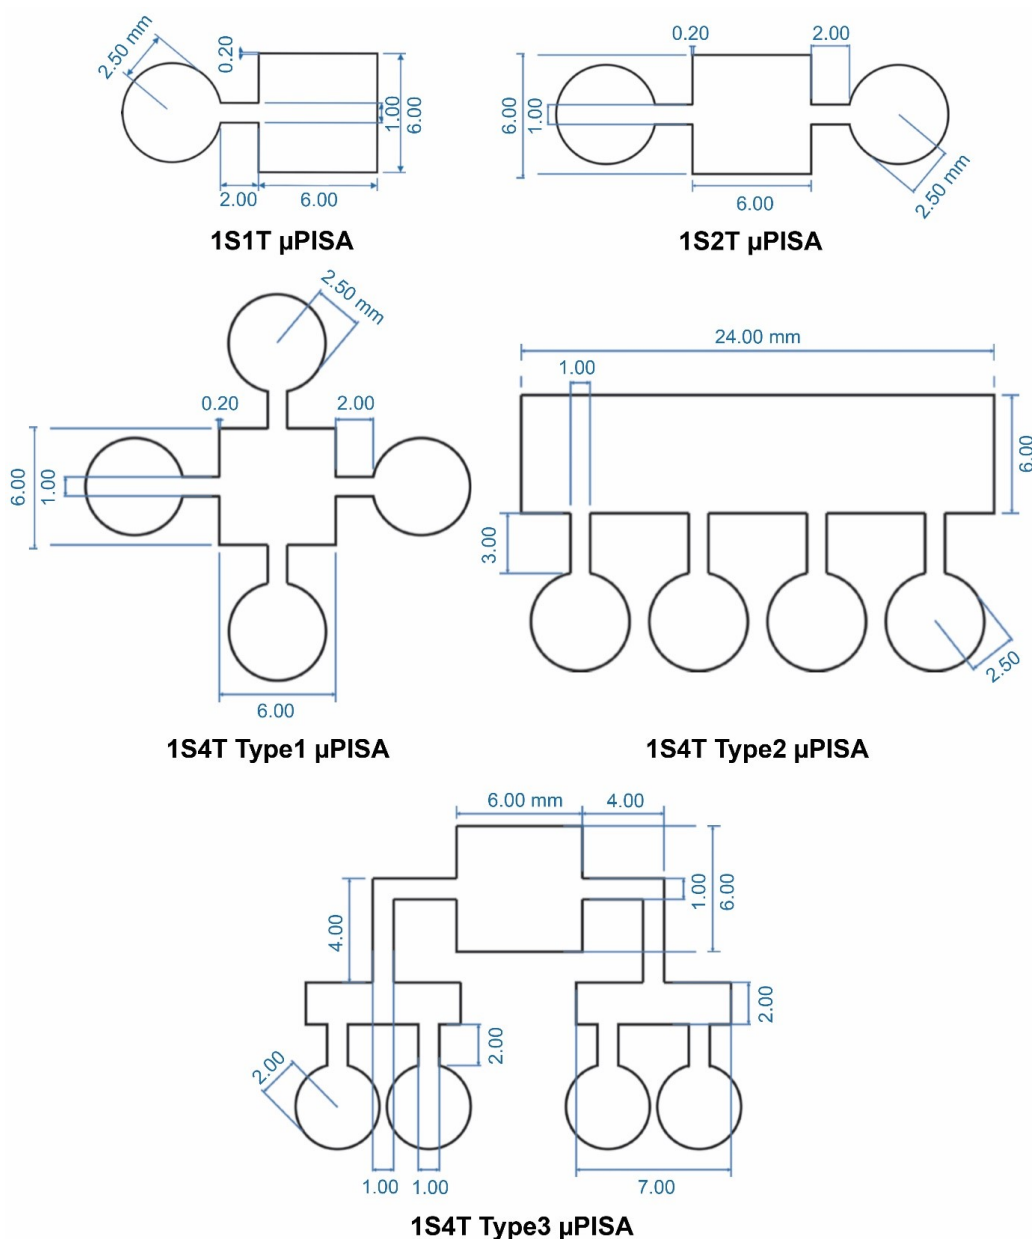

Fig. S1.  $\mu$ PISA platform models designed *via* CorelDRAW.

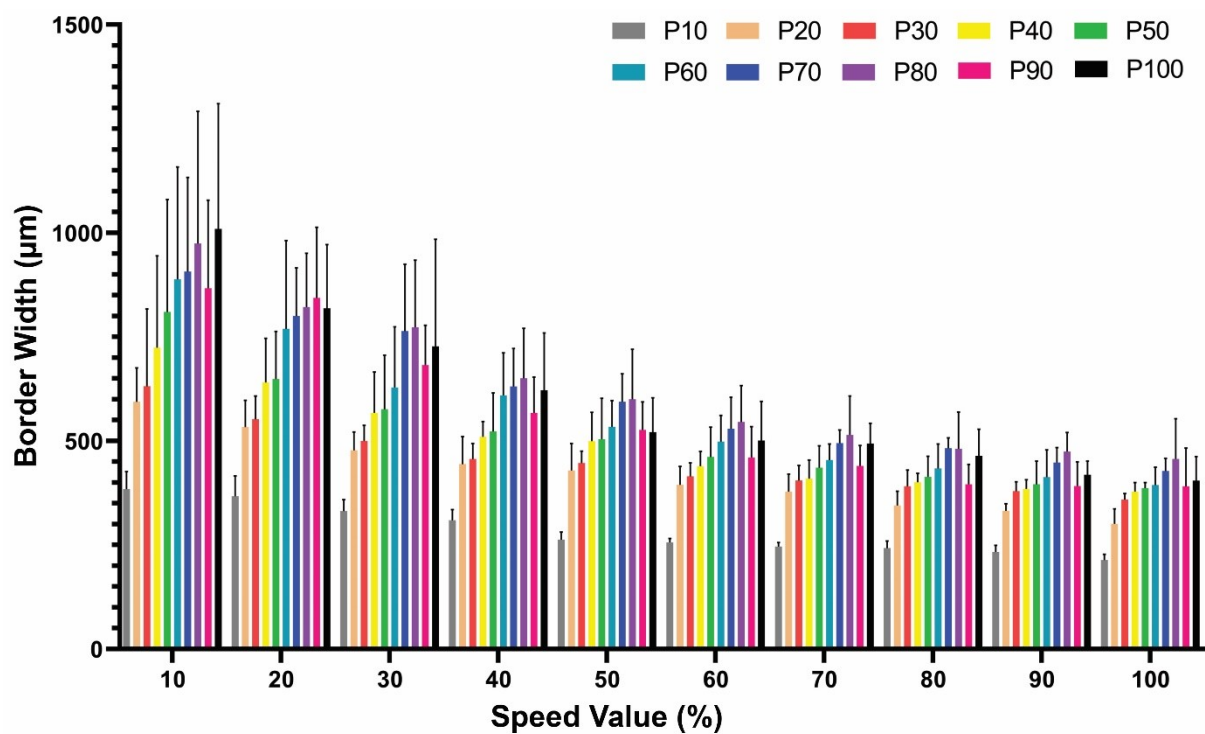

**Fig. S2.** Average barrier widths in 1S1T  $\mu$ PISA platform. The bars represent the average of eighteen measurements from three independent experiments and the error bars indicate the standard deviation.

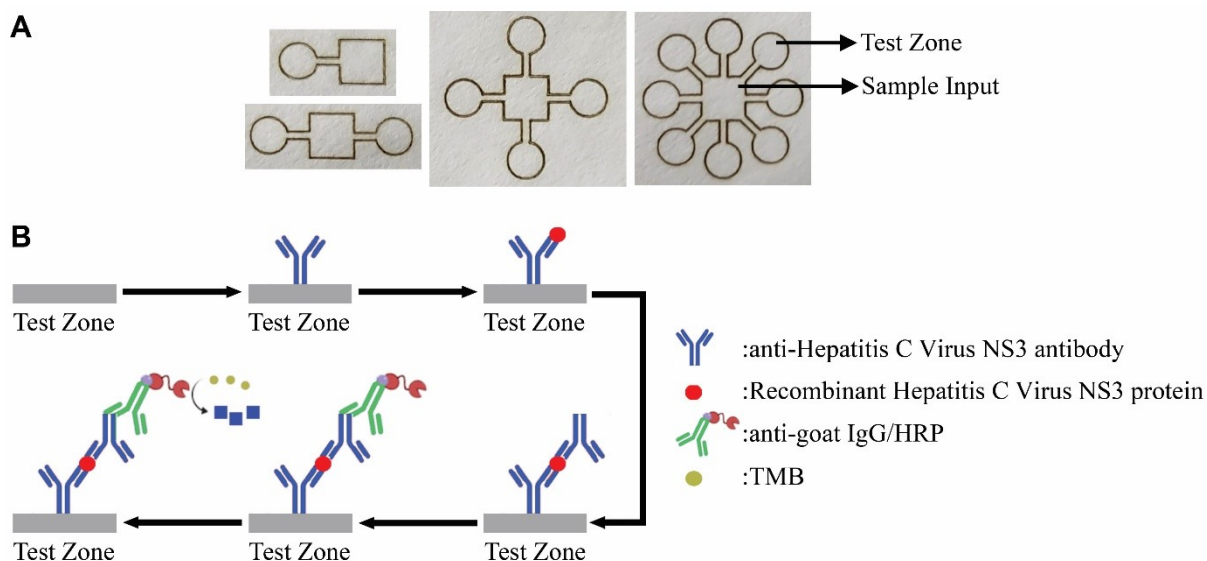

**Fig. S3.**  $\mu$ P-ELISA protocols in  $\mu$ PISA platforms. (A)  $\mu$ PISA platforms. (B) HCV NS3 protein detection.
